# Supplementary material for: MicroRNA-20b promotes cell growth of breast cancer cells partly via targeting phosphatase and tensin homologue (PTEN)
Source: PubMed Central journal article supplement (PMC4216355; doi:10.1186/2045-3701-4-62), 2014-10-14
Supplement: 13578_2014_189_MOESM2_ESM.pdf [file 13578_2014_189_MOESM2_ESM.pdf]

Table S1. Effect of miR-20b on cell cycle in MCF-7 cells.

| Group             | G <sub>0</sub> /G <sub>1</sub> (%) | S (%)      | G <sub>2</sub> /M (%) | Proliferation index    |
|-------------------|------------------------------------|------------|-----------------------|------------------------|
| Negative control  | 43.83±5.72                         | 38.60±6.80 | 17.57±3.16            | 0.56±0.06              |
| miR-20b inhibitor | 62.81±2.38                         | 28.54±2.06 | 8.65±0.59             | 0.37±0.02 <sup>a</sup> |

Proliferation index= (S phase + G<sub>2</sub>/M phase)/ (G<sub>0</sub>/G<sub>1</sub> phase + S phase + G<sub>2</sub>/M phase);

<sup>a</sup>*P* < 0.01, when compared with negative control.
